# Supplementary material
Source: PubMed Central journal article supplement (PMC7581410)
Supplement: mmc1.pdf [file mmc1.pdf]

## EPIDEMIOLOGICAL SURVEY OF THE IMPACT OF COVID-19 ON TELEMEDICINE IN PODIATRY

Thank you for considering to participate in this epidemiological survey. We are studying the impact of COVID-19 on telemedicine in podiatry. For the purposes of this survey, telemedicine is defined as the remote diagnosis and treatment of patients by means of telecommunications technology. This study is for podiatrists who are utilizing telehealth of any manner in patient care. (If you are not performing any active telemedicine, please decline the survey).

It is projected that the landscape of clinical medicine will change dramatically post-COVID-19 and that telemedicine will have an impact on all disciplines, including ours. In order to better understand how practitioners have been utilizing telemedicine, please answer the following short questions as accurately as possible. We promise it will not take long ( approximately 7-10 minutes). We appreciate it and hope that you and your loved ones are safe, and that we can get back to doing what we were trained to do.

**Robert Fridman, DPM, FACFAS, CWSP**  
New York, NY

1. What city and state do you practice in?

2. How many years have you been in clinical practice?

3. Assuming that you had a normal schedule, how many patients did you see weekly IN PERSON, on average in:

January 2020

February 2020

4. Were you utilizing any form of telemedicine prior to COVID-19?

Yes

No

5. On average, how many TOTAL PATIENTS (ESTABLISHED AND NEW) did you treat weekly via telemedicine in:

March 2020

April 2020

6. On average, how many NEW PATIENTS did you treat weekly via telemedicine in:

March 2020

April 2020

7. What modifiers have you been using for telemedicine billing?

8. For which of the following pathologies have you utilized telemedicine?

- |                                                                                    |                                                             |
|------------------------------------------------------------------------------------|-------------------------------------------------------------|
| <input type="checkbox"/> Trauma (fractures, sprains, etc)                          | <input type="checkbox"/> Dermatologic issues                |
| <input type="checkbox"/> Musculoskeletal issues or tendinitis (heel pain included) | <input type="checkbox"/> Post-op care                       |
| <input type="checkbox"/> Medical issues (gout, neuropathy, etc..)                  | <input type="checkbox"/> Pre-operative surgical discussions |
| <input type="checkbox"/> Infections                                                |                                                             |
| <input type="checkbox"/> Other (please specify)                                    |                                                             |

9. Please specify the percentage (%) of telehealth visits for each of the above pathologies (MUST ADD UP TO 100%)

Trauma (fractures, sprains, etc)

Musculoskeletal issues or tendinitis (heel pain included)

Medical issues (gout, neuropathy, etc..)

Infections

Dermatologic issues

Post-op care

Pre-operative surgical discussions

10. On a scale of 1-10 (with 1 the lowest, and 10 the highest) how effective do you feel telemedicine visits were for trauma (fractures, sprains, etc)?

1

2

3

4

5

6

7

8

9

10

N/A

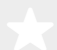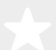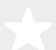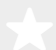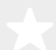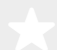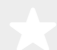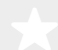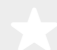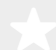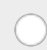



18. The following question is based on YOUR OPINION.

Please rank the pathologies MOST BENEFICIAL TO LEAST BENEFICIAL in regards to telemedicine

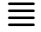

Trauma (fractures, sprains, etc)

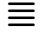

Musculoskeletal issues or tendinitis (heel pain included)



Medical issues (gout, neuropathy, etc..)

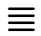

Infections

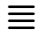

Dermatologic issues

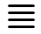

Post-operative care

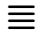

Pre-operative surgical discussions

19. Did you feel that you could effectively triage emergencies via telemedicine?

If yes, how many patients did you send in for admission in March 2020 and April 2020 after seeing them for a telemedicine visit?

20. On average, how long did your telemedicine visit last (in minutes)?

21. Did you coordinate care with a Visiting Nurse Service for your telemedicine evaluations?

22. What type(s) of video platforms did you use for telemedicine visits?

- |                                                 |                                                               |
|-------------------------------------------------|---------------------------------------------------------------|
| <input type="checkbox"/> Zoom                   | <input type="checkbox"/> Facetime                             |
| <input type="checkbox"/> Skype                  | <input type="checkbox"/> Whats App                            |
| <input type="checkbox"/> Google Hangouts        | <input type="checkbox"/> Proprietary EMR or Hospital Platform |
| <input type="checkbox"/> GoToMeeting            |                                                               |
| <input type="checkbox"/> Other (please specify) |                                                               |

23. Did you inform your patients that you were offering telemedicine as an option? If so, how did you do it

- Text
- Email
- Physical mailer
- Answering machine message
- Direct phone call
- Social media (Facebook, Twitter, Instagram, etc.)
- I did not inform my patients of a telemedicine option
- Other (please specify)

24. Was your office COMPLETELY CLOSED during COVID-19?

- Yes
- No

25. If your office remained open during the COVID-19 pandemic:

did you have modified office hours available?

how many hours per week would you usually see patients in person (not counting OR)

how many hours per week were you open during COVID-19?

26. If you recommended Durable Medical Equipment (DME) to your patients, did you...

- Have them order it online or at a surgical supply store
- Drop ship it to them from a vendor or from your office
- Did not participate in DME during COVID-19
- Other (please specify)

27. On a scale of 1-10 (with 1 the lowest, and 10 the highest), how likely will you integrate telemedicine visits into your practice post-COVID-19?

1      2      3      4      5      6      7      8      9      10

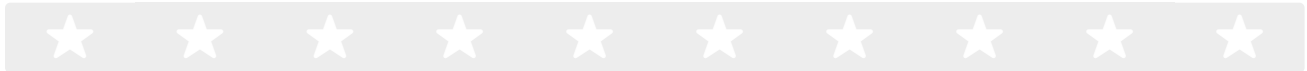

28. On a scale of 1-10 (with 1 the lowest, and 10 the highest), how important/relevant do you feel telemedicine visits will be post-COVID-19?

1      2      3      4      5      6      7      8      9      10

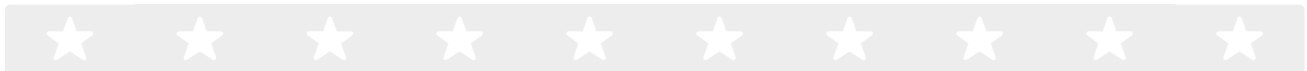

\* 29. What percent of your telemedicine visits do you feel resulted in preventing an unnecessary hospital admission?
